# Supplementary material
Source: PubMed Central journal article supplement (PMC7126040)
Supplement: rspb20200167supp1.pdf [file rspb20200167supp1.pdf]

Supplemental Material for

**Colour dimorphism in labrid fishes as an adaptation  
to life on coral reefs**

*in Proceedings of the Royal Society B: Biological Sciences*

Jennifer R. Hodge,<sup>1\*</sup> Francesco Santini,<sup>1</sup> Peter C. Wainwright<sup>1</sup>

<sup>1</sup> Department of Evolution & Ecology, University of California Davis,  
One Shields Avenue, Davis, CA 95616 USA

\* Corresponding author: [jennifer.renee.hodge@gmail.com](mailto:jennifer.renee.hodge@gmail.com)

† Present address: Department of Biological Sciences, Clemson University,  
108 Jordan Hall, Clemson, SC 29634 USA

## Contents of this PDF file

|   |                            |    |
|---|----------------------------|----|
| 1 | Figures                    | S3 |
|   | Figure S1                  | S3 |
| 2 | Tables                     | S4 |
|   | Table S2                   | S4 |
|   | Table S3                   | S5 |
|   | Table S5                   | S6 |
|   | Table S6                   | S7 |
|   | Table S7                   | S8 |
| 3 | Captions for Tables S1, S4 | S9 |

Other supplemental material for this manuscript includes: Tables S1, S4 (Excel file)

# 1 Figures

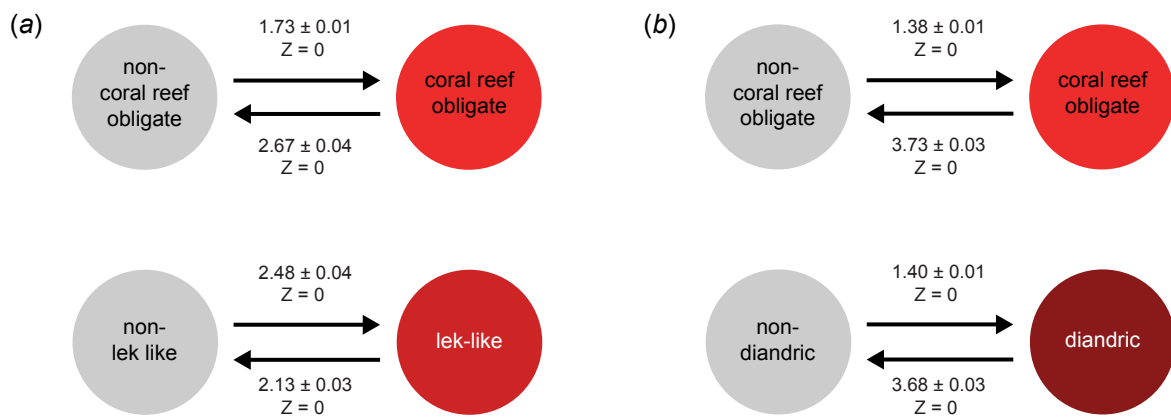

**Figure S1:** (a) Mean evolutionary transition rates ( $q_{xy} \pm SE$ ) derived from Bayesian models of discrete character evolution fit to predicted associations between coral reef exclusivity and lek-like mating. (b) Mean evolutionary transition rates ( $q_{xy} \pm SE$ ) derived from Bayesian models of discrete character evolution fit to predicted associations between coral reef exclusivity and diandry. In both panels, Z-scores below each transition rate denote the proportion of transition rates assigned to zero – values  $\leq 0.05$  are rarely assigned to zero and considered probable evolutionary events.

## 2 Tables

**Table S2:** Loadings from the logistic principal component analysis of the binary matrix describing colour dimorphism of labrid species.

|          | PC1    | PC2    |
|----------|--------|--------|
| head     | -0.372 | 0.466  |
| body     | -0.416 | 0.547  |
| pectoral | -0.280 | -0.493 |
| pelvic   | -0.301 | -0.391 |
| anal     | -0.431 | -0.279 |
| dorsal   | -0.476 | -0.083 |
| caudal   | -0.328 | 0.046  |

**Table S3:** Log marginal likelihoods estimated from dependent and independent models of character evolution, and corresponding log Bayes Factors (BFs). Three independent iterations tested for correlated evolution between coral reef exclusivity and lek-like polygyny, and between coral reef exclusivity and diandric protogyny. Log Bayes Factors indicate evidence against the null hypothesis (independent model), with values  $< 2$  indicating weak evidence, 2–5 indicating positive evidence, and  $> 5$  indicating strong evidence.

| Traits tested                                                             | Dependent model | Independent model | log Bayes Factor |
|---------------------------------------------------------------------------|-----------------|-------------------|------------------|
| coral reef exclusive/non-coral reef exclusive<br>& lek-like/non-lek-like: |                 |                   |                  |
|                                                                           | -105.46         | -102.83           | -5.25            |
|                                                                           | -105.46         | -102.87           | -5.18            |
|                                                                           | -105.43         | -102.88           | -5.10            |
| coral reef exclusive/non-coral reef exclusive<br>& diandric/non-diandric: |                 |                   |                  |
|                                                                           | -100.84         | -97.41            | -6.85            |
|                                                                           | -101.23         | -97.24            | -7.97            |
|                                                                           | -101.14         | -97.26            | -7.77            |

**Table S5:** Results of phylogenetic generalized linear models testing whether the probability of observing each colour group differs with coral reef association. Multiple starting values were specified for alpha (0.1, 0.5, and 0.9) to ensure the results returned the global maximum. Results with the maximum penalized likelihood are reported here as single values or a range of values in cases where multiple starting values returned the same maximum penalized likelihood. Significance codes are: (.) = P-values between 0.05 and 0.1; (\*) = P-values between 0.01 and 0.05; and (\*\*) = P-values less than 0.01.

|                | Colour group | Penalized log-likelihood | Alpha         | Estimate        | Standard error | Z-value         | P-value       | Significance code |
|----------------|--------------|--------------------------|---------------|-----------------|----------------|-----------------|---------------|-------------------|
| initial phase  | black/brown  | -17.68                   | 0.9533        | 0.4006          | 0.6106         | 0.6561          | 0.5117        |                   |
|                | white        | -21.75                   | 0.9678        | -0.7656         | 0.5277         | -1.4508         | 0.1468        |                   |
|                | yellow       | -51.80                   | 0.4694-0.5041 | 0.0064-0.0143   | 0.3099-0.3102  | 0.0206-0.0462   | 0.9631-0.9836 |                   |
|                | red/orange   | -50.86                   | 0.1553-0.1596 | 0.0414-0.0553   | 0.3214-0.3220  | 0.1287-0.1718   | 0.8636-0.8976 |                   |
|                | blue/green   | -56.61                   | 0.1715-0.1738 | 0.2828-0.2933   | 0.3046-0.3049  | 0.9285-0.9618   | 0.3361-0.3531 |                   |
| terminal phase | black/brown  | -29.73                   | 0.0744-0.0749 | -0.8005--0.7874 | 0.4470-0.4532  | -1.7664--1.7499 | 0.0773-0.0801 | .                 |
|                | white        | -48.42                   | 0.3631        | -1.0448         | 0.3377         | -3.0936         | 0.0020        | **                |
|                | yellow       | -50.09                   | 0.1367-0.1446 | 0.4351-0.4503   | 0.3305-0.3317  | 1.3127-1.3577   | 0.1746-0.1893 |                   |
|                | red/orange   | -37.99                   | 0.2427-0.2501 | 0.8129-0.8393   | 0.4171-0.4173  | 1.9489-2.0114   | 0.0443-0.0513 | * - .             |
|                | blue/green   | -29.90                   | 0.0135-0.0136 | 0.9550-0.9642   | 0.3744-0.3773  | 2.5503-2.5552   | 0.0106-0.0108 | *                 |

**Table S6:** The relationship between minimum, maximum and midpoint depth and the magnitude of colour dimorphism. Positive estimates reflect the expected relationship between depth and dichromatism such that as depth increases, dichromatism decreases.

|          | Estimate | SE    | Adjusted R <sup>2</sup> | t-value | P-value | Page's $\lambda$ | 95% CI      |
|----------|----------|-------|-------------------------|---------|---------|------------------|-------------|
| Minimum  | 0.281    | 0.227 | 0.030                   | 1.241   | 0.218   | 0.228            | 0.018–0.602 |
| Midpoint | 0.036    | 0.064 | 0.021                   | 0.558   | 0.578   | 0.187            | 0.006–0.553 |
| Maximum  | 0.015    | 0.035 | 0.020                   | 0.436   | 0.664   | 0.183            | 0.005–0.549 |

**Table S7:** Results of phylogenetic generalized linear models testing whether the probability of each body and fin region being colour-dimorphic varies with coral reef association. Multiple starting values were specified for alpha (0.1, 0.5, and 0.9) to ensure the results returned the global maximum. Results with the maximum penalized likelihood are reported here as single values or a range of values in cases where multiple starting values returned the same maximum penalized likelihood. Significance codes are: (.) = P-values between 0.05 and 0.1; (\*) = P-values between 0.01 and 0.05; and (\*\*) = P-values less than 0.01.

| Body/fin region | Penalized log-likelihood | Alpha       | Estimate      | Standard error | Z-value       | P-value       | Significance code |
|-----------------|--------------------------|-------------|---------------|----------------|---------------|---------------|-------------------|
| head            | -53.99                   | 0.1575625   | 0.7312        | 0.32271        | 2.2659        | 0.02346       | *                 |
| body            | -52.21                   | 0.1424935   | 0.757         | 0.32848        | 2.3045        | 0.02119       | *                 |
| pectoral fin    | -49.37                   | 0.081–0.082 | 0.5872–0.5875 | 0.3433–0.3436  | 1.7093–1.7113 | 0.0870–0.0874 | .                 |
| pelvic fin      | -44.38                   | 0.080–0.081 | 0.7967–0.8022 | 0.3559–0.3565  | 2.2352–2.2539 | 0.0242–0.0254 | *                 |
| anal fin        | -54.37                   | 0.128       | 0.5563–0.5659 | 0.3164–0.3168  | 1.7583–1.7866 | 0.0740–0.0787 | .                 |
| dorsal fin      | -54.47                   | 0.164–0.166 | 0.5919–0.5934 | 0.3169–0.3170  | 1.8672–1.8721 | 0.0612–0.0619 | .                 |
| caudal fin      | -52.54                   | 0.126–0.129 | 0.7504–0.7513 | 0.3313–0.3316  | 2.2629–2.2677 | 0.0234–0.0236 | *                 |



### 3 Captions for Tables S1, S4

**Table S1:** Trait data, colour dimorphism, and colour data by species. For colour dimorphism, '0' indicates colour similarity and '1' indicates colour difference between initial and terminal phase fish. The 'Proportion colour dimorphic' column summarises colour dimorphism data by indicating the proportion of body regions that were scored colour dimorphic relative to the total number of body regions considered. For colour group expression, '0' indicates absence and '1' indicates expression of the colour group by initial or terminal phase fish.

(separate file)

**Table S4:** Evolutionary models best-fit to colour dimorphism as predicted separately by habitat association, mating system and sex allocation. Models with  $\Delta AICc$  values less than two were considered to have comparable support (Comp. model). Regime specific parameters are denoted as: (N) non-coral reef; (A) coral reef associated; (E) coral reef exclusive; (P) promiscuous; (H) harem polygyny; (L) lek-like polygyny; (G) gonochorous; (M) monandric protogyny; and (D) diandric protogyny. 95% confidence intervals for all-best-fit model parameters were generated by parametric bootstrapping. Statistical power to identify the correct model, or class of model (i.e. single-peak versus multi-peak) was estimated with simulations. (separate file)
